# Supplementary material for: Morphology and Depositional Processes of a Carbonate-Filled Canyon in the Carboniferous KT-II Formation of the Eastern Precaspian Basin, Kazakhstan: Insight from 3D Seismic Data
Source: Hindawi journal article supplement (doi:10.1155/2023/3969979), 2023-10-05
Supplement: f1 [file 3969979.f1.pdf]

### Primary data

| Right | Width | Bottom | Middle | Thicknes<br>s | Distance | Centerline | Curvatur<br>e   | Slope                 |
|-------|-------|--------|--------|---------------|----------|------------|-----------------|-----------------------|
| 3245  | 1.48  | 3395   | 3300   | 95            |          | 0          |                 |                       |
| 3225  | 1.54  | 3375   | 3270   | 105           | 1.11     | 1.11       |                 |                       |
| 3210  | 2.1   | 3540   | 3290   | 250           | 1.5      | 2.61       |                 |                       |
| 3235  | 2.23  | 3515   | 3295   | 220           | 1.47     | 4.08       |                 |                       |
| 3320  | 2.59  | 3570   | 3365   | 205           | 1.63     | 5.71       |                 |                       |
| 3230  | 2.2   | 3615   | 3355   | 260           | 1.61     | 7.32       |                 |                       |
| 3355  | 2.19  | 3685   | 3435   | 250           | 1.6      | 8.92       |                 |                       |
| 3410  | 2.28  | 3725   | 3465   | 260           | 1.7      | 11.62      |                 |                       |
| 3415  | 2.18  | 3715   | 3450   | 265           | 1.69     | 12.31      |                 |                       |
| 3395  | 2.73  | 3685   | 3395   | 290           | 1.91     | 14.22      |                 |                       |
| 3450  | 2.54  | 3715   | 3415   | 300           | 1.73     | 15.95      |                 |                       |
| 3440  | 2.83  | 3735   | 3440   | 295           | 1.76     | 17.71      | 17.55           | 0.34 1.1098648<br>67  |
| 3425  | 1.94  | 3650   | 3455   | 195           | 0.85     | 18.56      |                 |                       |
| 3505  | 2.25  | 3630   | 3505   | 125           | 0.45     | 19.01      |                 |                       |
| 3480  | 1.4   | 3580   | 3500   | 80            | 0.4      | 19.41      |                 |                       |
| 3490  | 1.1   | 3590   | 3505   | 85            | 0.6      | 20.01      | 2.07            | 0.145 4.0069273<br>47 |
|       |       |        |        | 0             | 20.01    | 19.84      | 1.0085685<br>48 |                       |
| 3510  | 2.26  | 3775   | 3545   | 230           | 0.72     | 20.73      | 0.58            | 0.185 17.690889<br>62 |

|      |      |      |      |     |       |       |       |      |           |           |    |
|------|------|------|------|-----|-------|-------|-------|------|-----------|-----------|----|
| 3630 | 3.85 | 3890 | 3645 | 245 | 1.2   | 21.93 |       |      |           |           |    |
| 3690 | 3.77 | 3950 | 3665 | 285 | 1.14  | 23.07 |       |      |           |           |    |
| 3745 | 4.88 | 3935 | 3730 | 205 | 1.11  | 24.18 |       |      |           |           |    |
| 3755 | 4.74 | 4015 | 3740 | 275 | 0.75  | 24.93 | 4.07  |      | 0.24      | 3.3747129 | 72 |
| 3755 | 4.78 | 4005 | 3790 | 215 | 0.85  | 25.78 |       |      |           |           |    |
| 3745 | 4.77 | 4015 | 3805 | 210 | 0.74  | 26.52 |       |      |           |           |    |
| 3750 | 5.12 | 4055 | 3880 | 175 | 0.91  | 27.43 | 5.52  |      | 0.28      | 2.9038188 | 65 |
| 3705 | 3.38 | 4050 | 3785 | 265 | 0.98  | 28.41 |       |      |           |           |    |
| 3755 | 3.01 | 4065 | 3750 | 315 | 0.92  | 29.33 |       |      |           |           |    |
| 3770 | 3.27 | 4075 | 3760 | 315 | 0.69  | 30.02 |       |      |           |           |    |
| 3805 | 3.15 | 4095 | 3780 | 315 | 1.05  | 31.07 |       |      |           |           |    |
| 3825 | 2.93 | 4120 | 3760 | 360 | 1.18  | 32.25 | 10.11 | 345  | 0.345     | 1.9544388 | 17 |
| 3805 | 2.99 | 4070 | 3825 | 245 | 0.88  | 33.13 |       |      |           |           |    |
| 3780 | 2.11 | 4000 | 3780 | 220 | 1.01  | 34.14 |       |      |           |           |    |
| 3805 | 2.05 | 3910 | 3760 | 150 | 0.78  | 34.92 |       |      |           |           |    |
| 3805 | 1.92 | 3945 | 3760 | 185 | 0.87  | 35.79 | 3.43  |      | 0.175     | 2.9207215 | 21 |
|      |      |      |      | 0   | 15.78 | 14.12 | 36.67 | 14.2 | 1.1175637 |           |    |
|      |      |      |      |     |       |       |       |      |           | 39        |    |
| 3840 | 1.35 | 4130 | 3775 | 355 | 0.61  | 36.4  | 0.66  |      | 0.185     | 15.658345 | 3  |
| 3810 | 1.78 | 4135 | 3775 | 360 | 0.55  | 36.95 |       |      |           |           |    |
| 3765 | 2.24 | 4135 | 3775 | 360 | 0.45  | 37.4  |       |      |           |           |    |



## Statistics

| length | left | right | bottom | middle | width |
|--------|------|-------|--------|--------|-------|
| 0      | 3355 | 3245  | 3395   | 3300   | 1.48  |
| 1.11   | 3315 | 3225  | 3375   | 3270   | 1.54  |
| 2.61   | 3355 | 3210  | 3540   | 3290   | 2.1   |
| 4.08   | 3365 | 3235  | 3515   | 3295   | 2.23  |
| 5.71   | 3430 | 3320  | 3570   | 3365   | 2.59  |
| 7.32   | 3465 | 3230  | 3615   | 3355   | 2.2   |
| 8.92   | 3485 | 3355  | 3685   | 3435   | 2.19  |
| 11.62  | 3515 | 3410  | 3725   | 3465   | 2.28  |
| 12.31  | 3500 | 3415  | 3715   | 3450   | 2.18  |
| 14.22  | 3405 | 3395  | 3685   | 3395   | 2.73  |
| 15.95  | 3410 | 3450  | 3715   | 3415   | 2.54  |
| 17.71  | 3455 | 3440  | 3735   | 3440   | 2.83  |
| 18.56  | 3495 | 3425  | 3650   | 3455   | 1.94  |
| 19.01  | 3505 | 3505  | 3630   | 3505   | 2.25  |
| 19.41  | 3570 | 3480  | 3580   | 3500   | 1.4   |
| 20.01  | 3545 | 3490  | 3590   | 3505   | 1.1   |
| 20.73  | 3575 | 3510  | 3775   | 3545   | 2.26  |
| 21.93  | 3720 | 3630  | 3890   | 3645   | 3.85  |
| 23.07  | 3650 | 3690  | 3950   | 3665   | 3.77  |
| 24.18  | 3725 | 3745  | 3935   | 3730   | 4.88  |
| 24.93  | 3735 | 3755  | 4015   | 3740   | 4.74  |
| 25.78  | 3825 | 3755  | 4005   | 3790   | 4.78  |

|       |      |      |      |      |      |
|-------|------|------|------|------|------|
| 26.52 | 3900 | 3745 | 4015 | 3805 | 4.77 |
| 27.43 | 4000 | 3750 | 4055 | 3880 | 5.12 |
| 28.41 | 3860 | 3705 | 4050 | 3785 | 3.38 |
| 29.33 | 3745 | 3755 | 4065 | 3750 | 3.01 |
| 30.02 | 3775 | 3770 | 4075 | 3760 | 3.27 |
| 31.07 | 3760 | 3805 | 4095 | 3780 | 3.15 |
| 32.25 | 3735 | 3825 | 4120 | 3760 | 2.93 |
| 33.13 | 3855 | 3805 | 4070 | 3825 | 2.99 |
| 34.14 | 3780 | 3780 | 4000 | 3780 | 2.11 |
| 34.92 | 3745 | 3805 | 3910 | 3760 | 2.05 |
| 35.79 | 3720 | 3805 | 3945 | 3760 | 1.92 |
| 36.4  | 3740 | 3840 | 4130 | 3775 | 1.35 |
| 36.95 | 3730 | 3810 | 4135 | 3775 | 1.78 |
| 37.4  | 3820 | 3765 | 4135 | 3775 | 2.24 |
| 38.12 | 3820 | 3805 | 4150 | 3810 | 2.54 |
| 38.77 | 3800 | 3795 | 4180 | 3795 | 2.24 |
| 39.49 | 3885 | 3795 | 4205 | 3830 | 2.62 |
| 40.36 | 3830 | 3780 | 4210 | 3825 | 2.9  |
| 41.22 | 3805 | 3805 | 4215 | 3805 | 2.5  |
| 42.06 | 3835 | 3775 | 4245 | 3795 | 2.59 |
| 42.77 | 3915 | 3740 | 4220 | 3835 | 2.83 |
| 43.66 | 3850 | 3785 | 4270 | 3830 | 3.08 |
| 44.4  | 3875 | 3835 | 4255 | 3850 | 3.58 |
| 45.09 | 3875 | 3880 | 4270 | 3875 | 3.56 |
| 46.02 | 3850 | 3880 | 4270 | 3855 | 3.12 |
| 46.49 | 3795 | 3890 | 4275 | 3905 | 3.45 |

Figure 6a

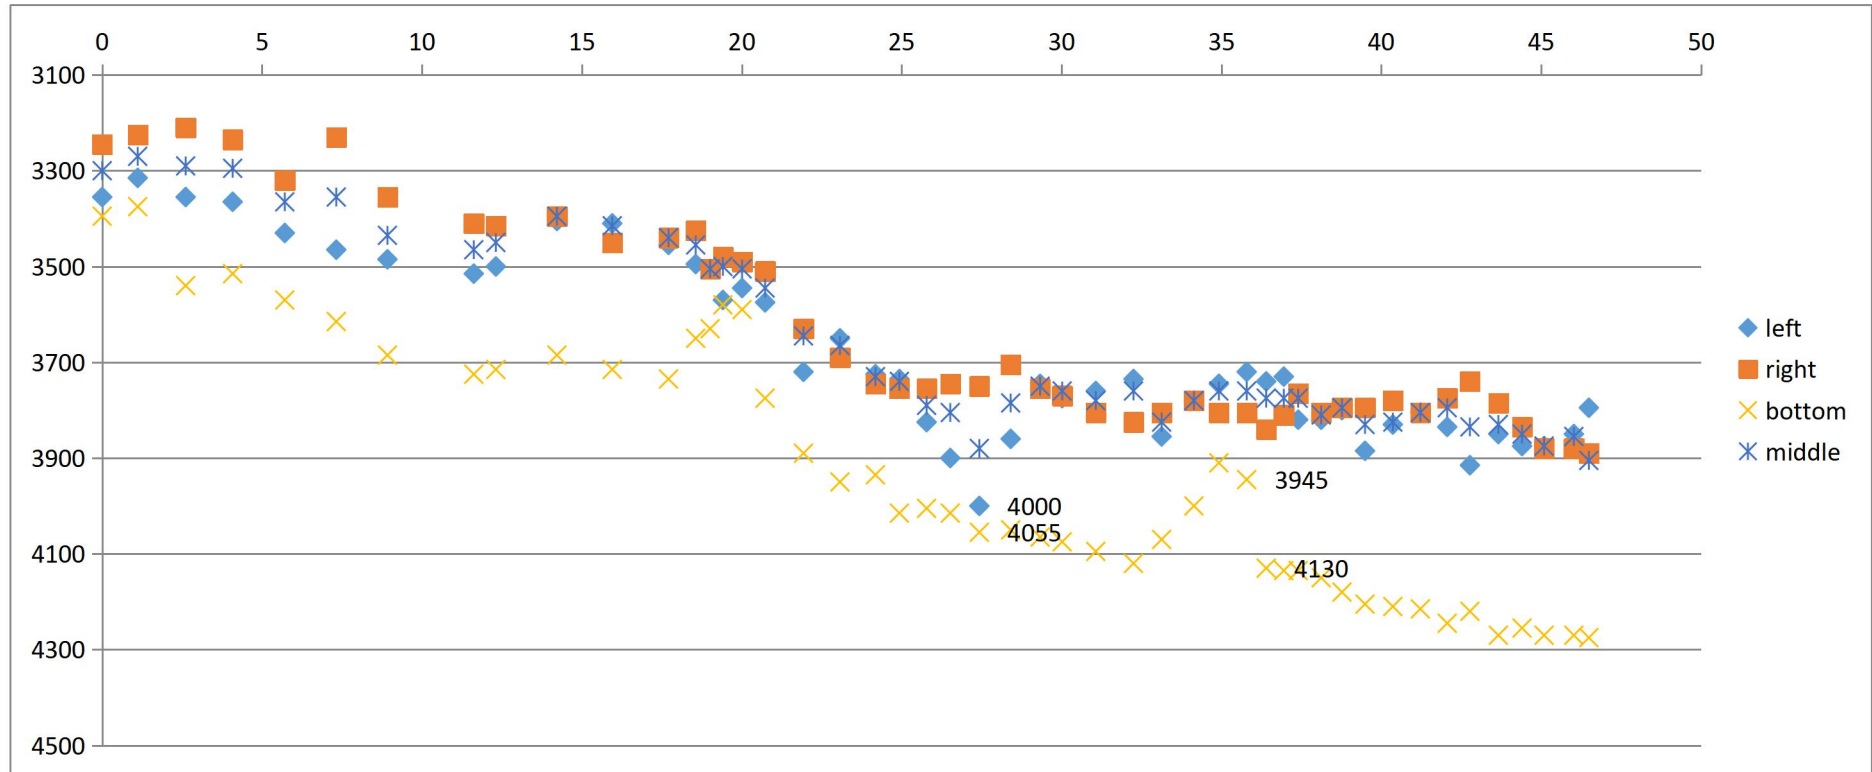

### Quantification results of the canyon geomorphology

| length | width | left | right | bottom | mid  |
|--------|-------|------|-------|--------|------|
| 0      | 1.48  | 3355 | 3245  | 3395   | 3300 |
| 1.11   | 1.54  | 3315 | 3225  | 3375   | 3270 |
| 2.61   | 2.1   | 3355 | 3210  | 3540   | 3290 |
| 4.08   | 2.23  | 3365 | 3235  | 3515   | 3295 |
| 5.71   | 2.59  | 3430 | 3320  | 3570   | 3365 |
| 7.32   | 2.2   | 3465 | 3230  | 3615   | 3355 |
|        | 2.19  | 3485 | 3355  | 3685   | 3435 |
| 11.62  | 2.28  | 3515 | 3410  | 3725   | 3465 |
| 12.31  | 2.18  | 3500 | 3415  | 3715   | 3450 |
| 14.22  | 2.73  | 3405 | 3395  | 3685   | 3395 |
| 15.95  | 2.54  | 3410 | 3450  | 3715   | 3415 |
| 17.71  | 2.83  | 3455 | 3440  | 3735   | 3440 |
| 18.56  | 1.94  | 3495 | 3425  | 3650   | 3455 |
| 19.01  | 2.25  | 3505 | 3505  | 3630   | 3505 |
| 19.41  | 1.4   | 3570 | 3480  | 3580   | 3500 |
| 20.01  | 1.1   | 3545 | 3490  | 3590   | 3505 |
| 20.73  | 2.26  | 3575 | 3510  | 3775   | 3545 |
| 21.93  | 3.85  | 3720 | 3630  | 3890   | 3645 |
| 23.07  | 3.77  | 3650 | 3690  | 3950   | 3665 |
| 24.18  | 4.88  | 3725 | 3745  | 3935   | 3730 |
| 24.93  | 4.74  | 3735 | 3755  | 4015   | 3740 |

|       |      |      |      |      |      |
|-------|------|------|------|------|------|
| 25.78 | 4.78 | 3825 | 3755 | 4005 | 3790 |
| 26.52 | 4.77 | 3900 | 3745 | 4015 | 3805 |
| 27.43 | 5.12 | 4000 | 3750 | 4055 | 3880 |
| 28.41 | 3.38 | 3860 | 3705 | 4050 | 3785 |
| 29.33 | 3.01 | 3745 | 3755 | 4065 | 3750 |
| 30.02 | 3.27 | 3775 | 3770 | 4075 | 3760 |
| 31.07 | 3.15 | 3760 | 3805 | 4095 | 3780 |
| 32.25 | 2.93 | 3735 | 3825 | 4120 | 3760 |
| 33.13 | 2.99 | 3855 | 3805 | 4070 | 3825 |
| 34.14 | 2.11 | 3780 | 3780 | 4000 | 3780 |
| 34.92 | 2.05 | 3745 | 3805 | 3910 | 3760 |
| 35.79 | 1.92 | 3720 | 3805 | 3945 | 3760 |
| 36.4  | 1.35 | 3740 | 3840 | 4130 | 3775 |
| 36.95 | 1.78 | 3730 | 3810 | 4135 | 3775 |
| 37.4  | 2.24 | 3820 | 3765 | 4135 | 3775 |
| 38.12 | 2.54 | 3820 | 3805 | 4150 | 3810 |
| 38.77 | 2.24 | 3800 | 3795 | 4180 | 3795 |
| 39.49 | 2.62 | 3885 | 3795 | 4205 | 3830 |
| 40.36 | 2.9  | 3830 | 3780 | 4210 | 3825 |
| 41.22 | 2.5  | 3805 | 3805 | 4215 | 3805 |
| 42.06 | 2.59 | 3835 | 3775 | 4245 | 3795 |
| 42.77 | 2.83 | 3915 | 3740 | 4220 | 3835 |
| 43.66 | 3.08 | 3850 | 3785 | 4270 | 3830 |
| 44.4  | 3.58 | 3875 | 3835 | 4255 | 3850 |
| 45.09 | 3.56 | 3875 | 3880 | 4270 | 3875 |
| 46.02 | 3.12 | 3850 | 3880 | 4270 | 3855 |



46.49

3.45

3795

3890

4275

3905

Figure 6a

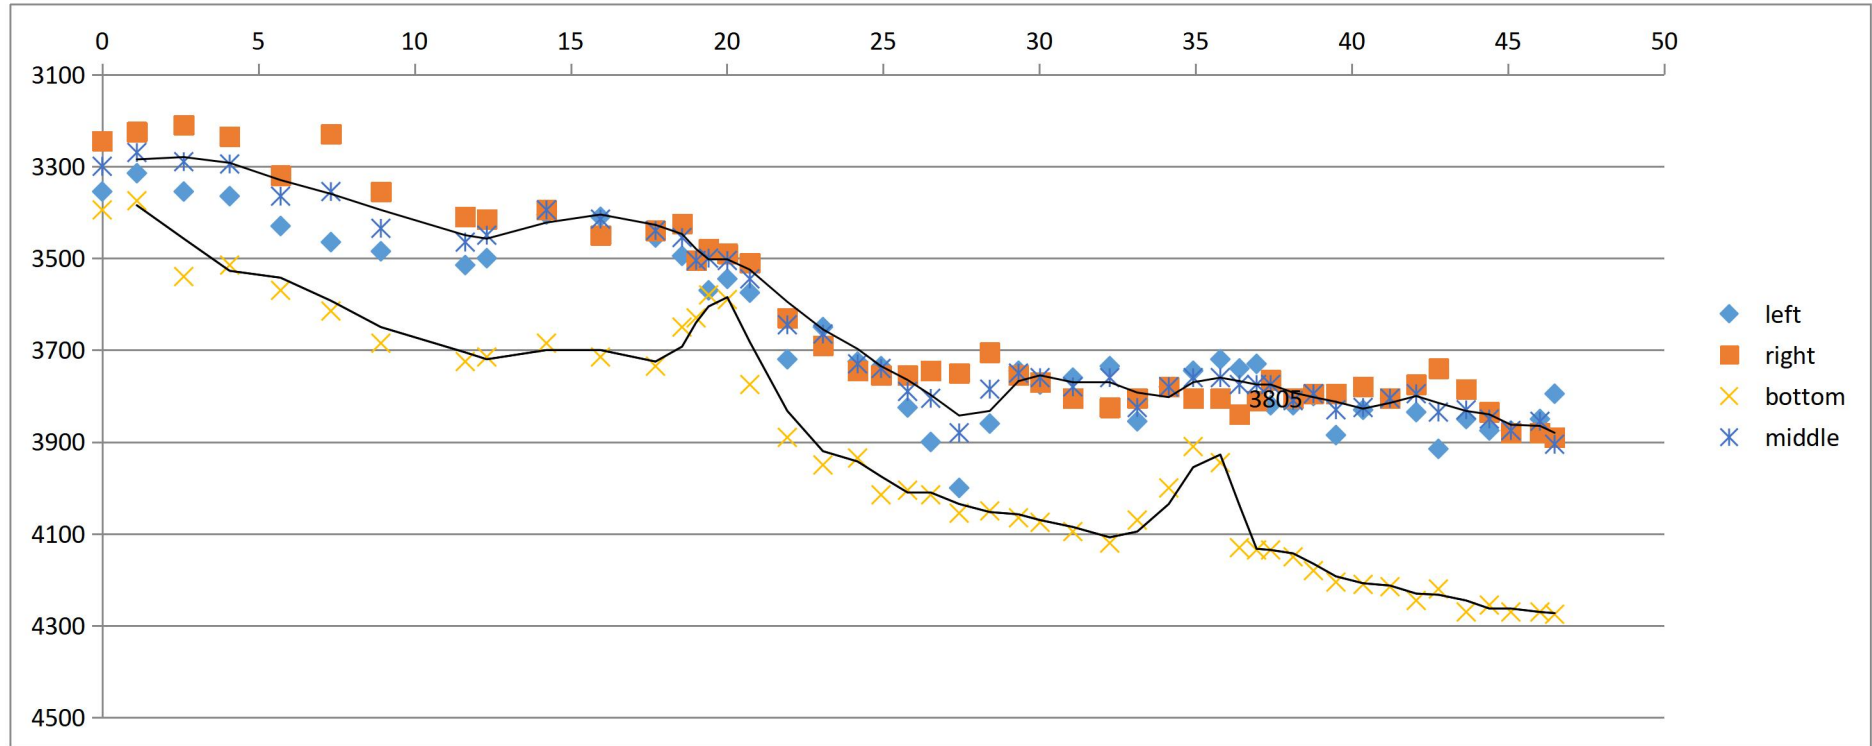

Figure 6b

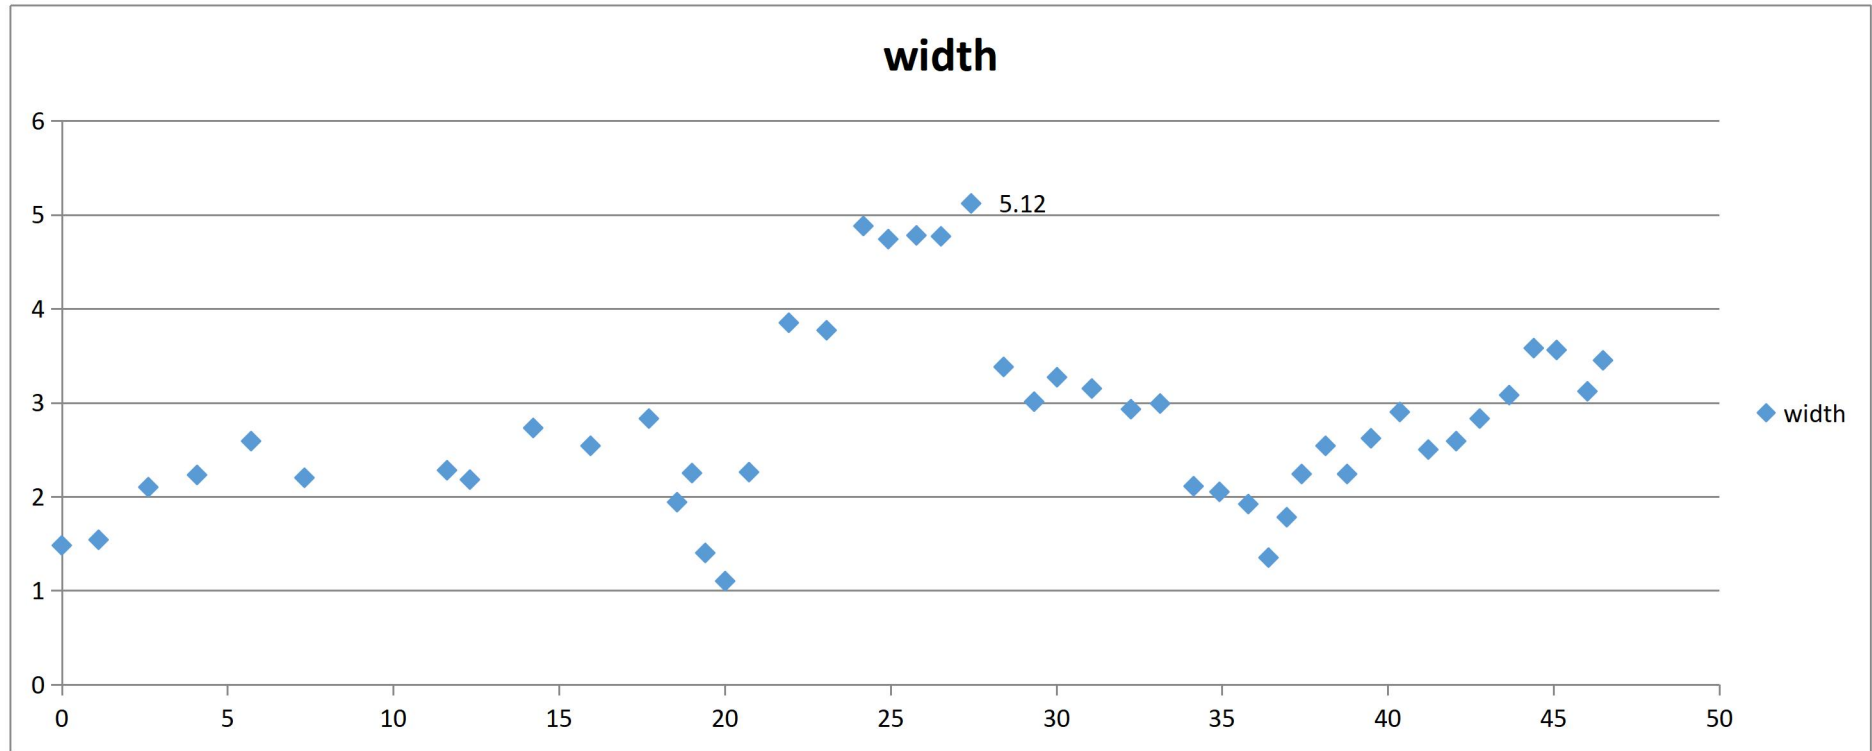

### Slope data

| length | bottom | bottom |       |      |             |
|--------|--------|--------|-------|------|-------------|
| 0      | 3395   | 3.395  |       |      |             |
| 1.11   | 3375   | 3.375  |       |      |             |
| 2.61   | 3540   | 3.54   | 0.145 | 2.61 | 3.17983012  |
| 4.08   | 3515   | 3.515  |       |      |             |
| 5.71   | 3570   | 3.57   |       |      |             |
| 7.32   | 3615   | 3.615  |       |      |             |
| 8.92   | 3685   | 3.685  |       |      |             |
| 11.62  | 3725   | 3.725  | 0.185 | 7.96 | 1.331383334 |
| 12.31  | 3715   | 3.715  |       |      |             |
| 14.22  | 3685   | 3.685  |       |      |             |
| 15.95  | 3715   | 3.715  |       |      |             |
| 17.71  | 3735   | 3.735  | 0.01  | 6.6  | 0.086811721 |
| 18.56  | 3650   | 3.65   |       |      |             |
| 19.01  | 3630   | 3.63   |       |      |             |
| 19.41  | 3580   | 3.58   |       |      |             |
| 20.01  | 3590   | 3.59   | 0.145 | 2.02 | 4.105773606 |

|       |      |       |       |      |             |
|-------|------|-------|-------|------|-------------|
| 20.73 | 3775 | 3.775 |       |      |             |
| 21.93 | 3890 | 3.89  |       |      |             |
| 23.07 | 3950 | 3.95  |       |      |             |
| 24.18 | 3935 | 3.935 |       |      |             |
| 24.93 | 4015 | 4.015 | 0.425 | 4.69 | 5.177906046 |
| 25.78 | 4005 | 4.005 |       |      |             |
| 26.52 | 4015 | 4.015 |       |      |             |
| 27.43 | 4055 | 4.055 |       |      |             |
| 28.41 | 4050 | 4.05  |       |      |             |
| 29.33 | 4065 | 4.065 |       |      |             |
| 30.02 | 4075 | 4.075 |       |      |             |
| 31.07 | 4095 | 4.095 |       |      |             |
| 32.25 | 4120 | 4.12  | 0.105 | 6.45 | 0.932639612 |
| 33.13 | 4070 | 4.07  |       |      |             |
| 34.14 | 4000 | 4     |       |      |             |
| 34.92 | 3910 | 3.91  | 0.21  | 2.67 | 4.497151615 |
| 35.79 | 3945 | 3.945 | 0.035 | 0.6  | 3.338470544 |
| 36.4  | 4130 | 4.13  |       |      |             |
| 36.95 | 4135 | 4.135 |       |      |             |
| 37.4  | 4135 | 4.135 |       |      |             |
| 38.12 | 4150 | 4.15  |       |      |             |
| 38.77 | 4180 | 4.18  |       |      |             |
| 39.49 | 4205 | 4.205 |       |      |             |
| 40.36 | 4210 | 4.21  |       |      |             |
| 41.22 | 4215 | 4.215 |       |      |             |
| 42.06 | 4245 | 4.245 |       |      |             |

|       |      |       |      |      |             |
|-------|------|-------|------|------|-------------|
| 42.77 | 4220 | 4.22  |      |      |             |
| 43.66 | 4270 | 4.27  |      |      |             |
| 44.4  | 4255 | 4.255 |      |      |             |
| 45.09 | 4270 | 4.27  |      |      |             |
| 46.02 | 4270 | 4.27  |      |      |             |
| 46.49 | 4275 | 4.275 | 0.33 | 9.63 | 1.962638779 |
